# Supplementary material for: Hemocyte-mediated phagocytosis differs between honey bee (Apis mellifera) worker castes
Source: PubMed Central journal article supplement (PMC5587260; doi:10.1371/journal.pone.0184108), 2017-09-06
Supplement: pone.0184108.s001.pdf [file pone.0184108.s001.pdf]

1  
2  
3  
4  
5  
6  
7  
8  
9  
10  
11  
12  
13

Nuclei, F-actin

Vitellogenin

Overlay

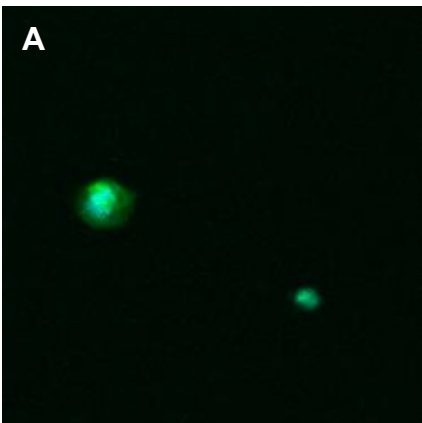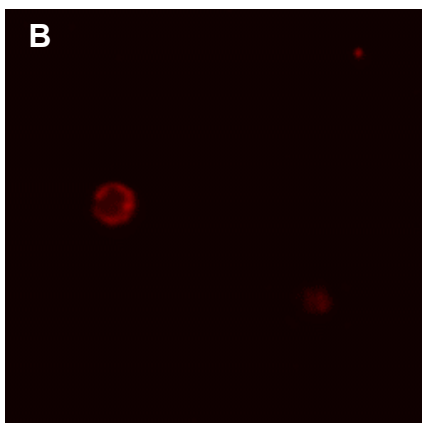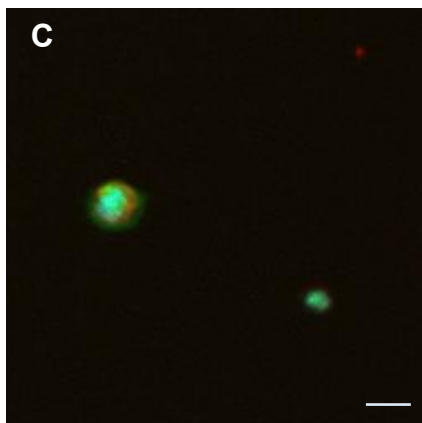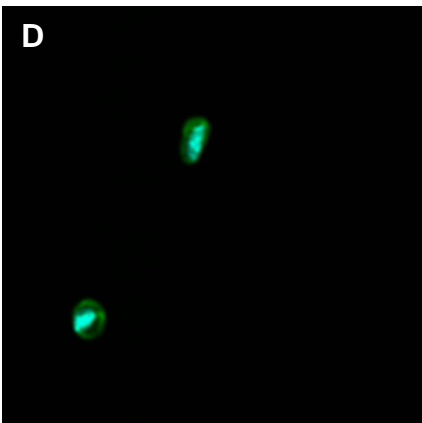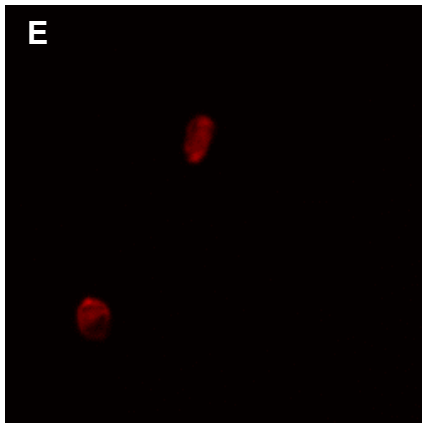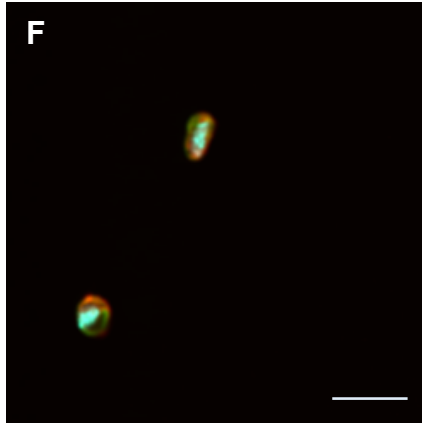

14 **S1 Fig**
