# Supplementary material for: Hemocyte-mediated phagocytosis differs between honey bee (Apis mellifera) worker castes
Source: PubMed Central journal article supplement (PMC5587260; doi:10.1371/journal.pone.0184108), 2017-09-06
Supplement: pone.0184108.s002.pdf [file pone.0184108.s002.pdf]

| ID        | Percentage  |
|-----------|-------------|
| Bead 1    | 1,851851852 |
| Bead 2    | 4,838709677 |
| Bead 3    | 1,923076923 |
| Bead 4    | 1,176470588 |
| Bead 5    | 5,970149254 |
| Bead 6    | 8,474576271 |
| Bead 7    | 0           |
| Bead 8    | 0           |
| Bead 9    | 3,125       |
| Bead 10   | 3,846153846 |
| Bead 11   | 1,650165017 |
| CM-Dil 1  | 4,87804878  |
| CM-Dil 2  | 8,421052632 |
| CM-Dil 3  | 4,47761194  |
| CM-Dil 4  | 1,408450704 |
| CM-Dil 5  | 13,63636364 |
| CM-Dil 6  | 4           |
| CM-Dil 7  | 1,612903226 |
| CM-Dil 8  | 3,496503497 |
| CM-Dil 9  | 0           |
| CM-Dil 10 | 0           |
| CM-Dil 11 | 0           |
| CM-Dil 12 | 0           |
| CM-Dil 13 | 1,515151515 |
| CM-Dil 14 | 3,719008264 |
| CM-Dil 15 | 2,127659574 |
