# Supplementary material for: Hemocyte-mediated phagocytosis differs between honey bee (Apis mellifera) worker castes
Source: PubMed Central journal article supplement (PMC5587260; doi:10.1371/journal.pone.0184108), 2017-09-06
Supplement: pone.0184108.s003.pdf [file pone.0184108.s003.pdf]

| Sample     | % Phagocytic cells |
|------------|--------------------|
| Ec1        | 0                  |
| Ec3        | 4,109589041        |
| Ec4        | 3,80952381         |
| Ec5        | 1,639344262        |
| Ec6        | 4,166666667        |
| Ec7        | 0                  |
| Ec8        | 4,615384615        |
| Ec9        | 3,968253968        |
| Ec10       | 6,52173913         |
| Ec12       | 0,760456274        |
| Ec13       | 5,714285714        |
| Ec14       | 2,941176471        |
| Grace1     | 4,081632653        |
| Grace2     | 0                  |
| Grace3     | 3,225806452        |
| Grace4     | 0,492610837        |
| Grace5     | 2,597402597        |
| Grace6     | 14,70588235        |
| Grace7     | 1,351351351        |
| Grace8     | 4,761904762        |
| Grace9     | 1,176470588        |
| Grace10    | 8,379888268        |
| Grace11    | 5,194805195        |
| Grace12    | 0,892857143        |
| Control 1  | 6,790123457        |
| Control 2  | 13,63636364        |
| Control 4  | 1,694915254        |
| Control 5  | 0                  |
| Control 6  | 5,309734513        |
| Control 7  | 1,986754967        |
| Control 8  | 2,941176471        |
| Control 9  | 3,448275862        |
| Control 10 | 7,894736842        |
