# Supplementary material for: Hemocyte-mediated phagocytosis differs between honey bee (Apis mellifera) worker castes
Source: PubMed Central journal article supplement (PMC5587260; doi:10.1371/journal.pone.0184108), 2017-09-06
Supplement: pone.0184108.s005.pdf [file pone.0184108.s005.pdf]

| Name       | % Vg positive cells | % Mitotic cells | Group |
|------------|---------------------|-----------------|-------|
| _1 N.014   | 89,87730061         | 3,269754768     | N     |
| _2 N.015   | 81,4516129          | 3,645833333     | N     |
| _3 N.016   | 87,71929825         | 6,707317073     | N     |
| _4 N.017   | 81,97278912         | 5,685618729     | N     |
| _7 N.018   | 89,33717579         | 8,707865169     | N     |
| _8 N.019   | 76,57657658         | 1,307189542     | N     |
| _9 N.020   | 77,77777778         | 3,95480226      | N     |
| _10 N.021  | 79,75206612         | 5,185185185     | N     |
| _13 F.022  | 84,40860215         | 9,578544061     | F     |
| _14 F.023  | 79,50819672         | 2,43902439      | F     |
| _15 F.024  | 80,56338028         | 5,292479109     | F     |
| _16 F.025  | 93,97260274         | 4,146341463     | F     |
| _19 F.026  | 80,76923077         | 5,703422053     | F     |
| _20 F.027  | 78,31325301         | 2,325581395     | F     |
| _21 F.028  | 86,8852459          | 6,111111111     | F     |
| _22 F.029  | 82,11382114         | 1,621621622     | F     |
| _25 W.030  | 86,14457831         | 16,91729323     | W     |
| _26 W.031  | 91,08910891         | 15,15151515     | W     |
| _27 W.032  | 94,90333919         | 6,692913386     | W     |
| _28 W.033  | 86,02150538         | 13,63636364     | W     |
| _31 W.034  | 88,23529412         | 12,32876712     | W     |
| _32 W.035  | 89,47368421         | 17,92828685     | W     |
| _33 W.036  | 96,16724739         | 3,006329114     | W     |
| _34 W.037  | 88,88888889         | 3,344481605     | W     |
| _37 N.054  | 87,67908309         | 33,43108504     | N     |
| _38 N.055  | 77,09251101         | 7,5             | N     |
| _39 N.056  | 84,14096916         | 5,853658537     | N     |
| _43 N.057  | 78,57142857         | 16,52542373     | N     |
| _44 N.058  | 80,3652968          | 5,240174672     | N     |
| _45 N.059  | 80,35320088         | 4,705882353     | N     |
| _50 F.061  | 78,86178862         | 0,787401575     | F     |
| _51 F.062  | 78,37837838         | 1,276595745     | F     |
| _55 F.063  | 85,5227882          | 9,034267913     | F     |
| _56 F.064  | 78,82736156         | 5,94795539      | F     |
| _57 F.065  | 78,74015748         | 2,272727273     | F     |
| _61 W.066  | 77,28842832         | 30,42328042     | W     |
| _62 W.067  | 85,2739726          | 16,72473868     | W     |
| _63 W.068  | 85,34883721         | 26,50918635     | W     |
| _67 W.069  | 87,6146789          | 10,93023256     | W     |
| _68 W.070  | 81,84931507         | 20,81784387     | W     |
| _69 W.071  | 84,43579767         | 13,75           | W     |
| _FA H1.038 | 80,17241379         | 2,162162162     | F     |
| _FB H1.039 | 83,65384615         | 1,449275362     | F     |
| _FC H1.041 | 76,10619469         | 4,301075269     | F     |
| _FD H1.042 | 81,81818182         | 2,4             | F     |
| _NA H1.072 | 77,6119403          | 6,52173913      | N     |
